# Supplementary figures and images for: A reconstruction of Iberia accounting for W-Tethys/N-Atlantic kinematics since the late Permian-Triassic
Source: Copernicus journal article supplement (doi:10.5194/se-2020-24), 2020-03-06

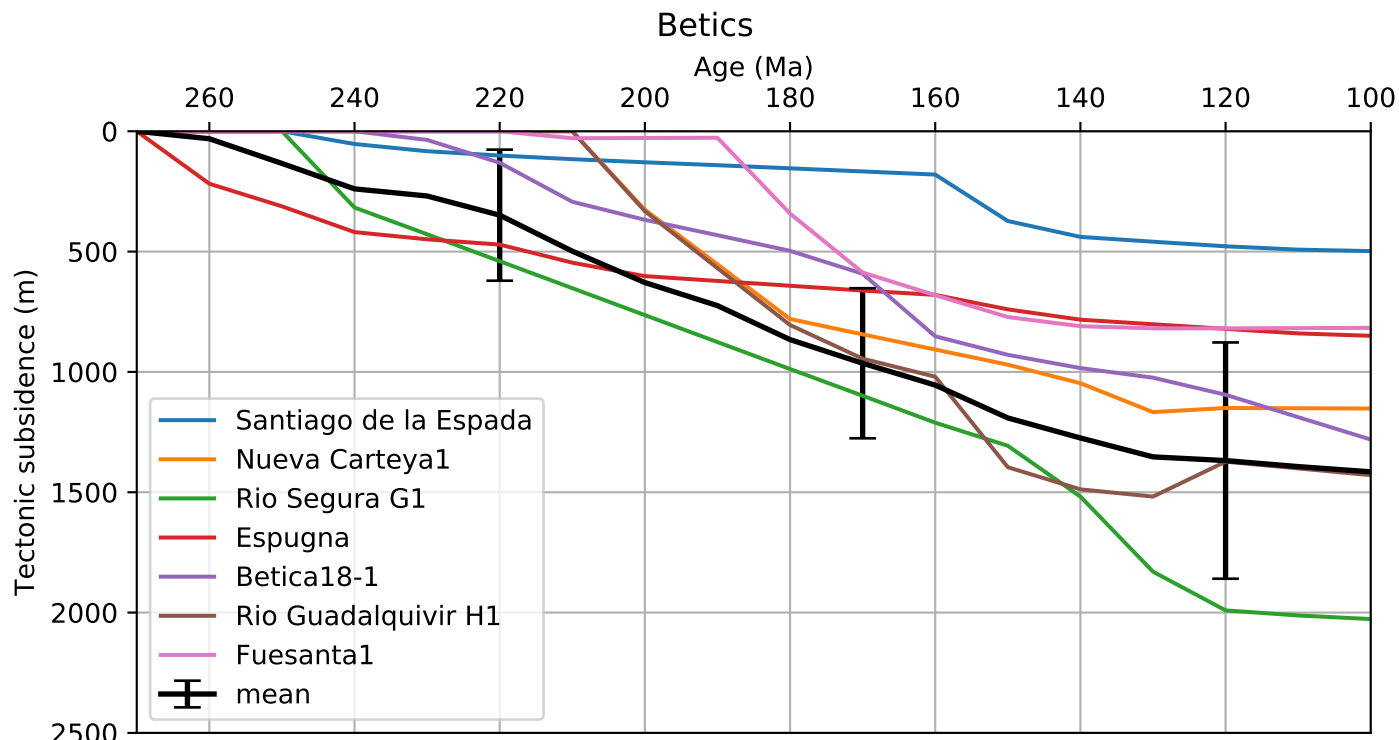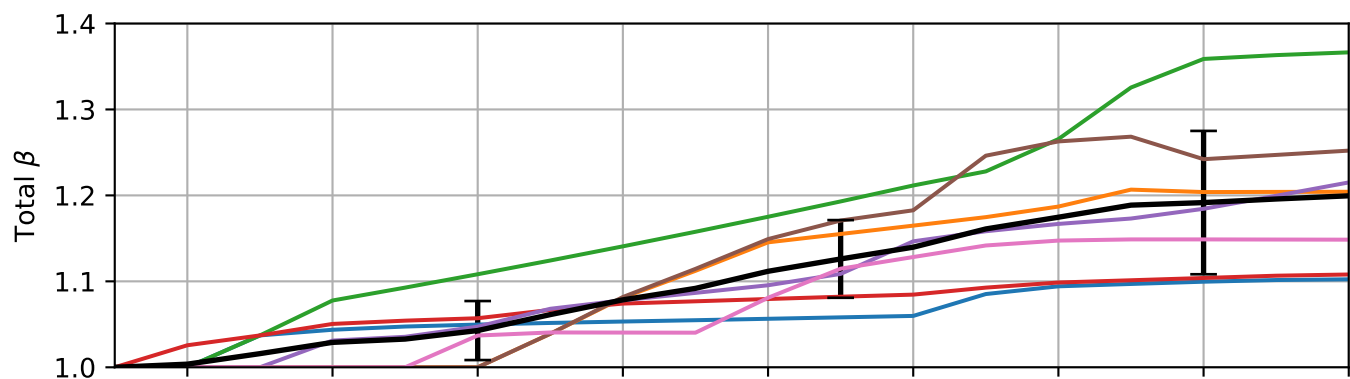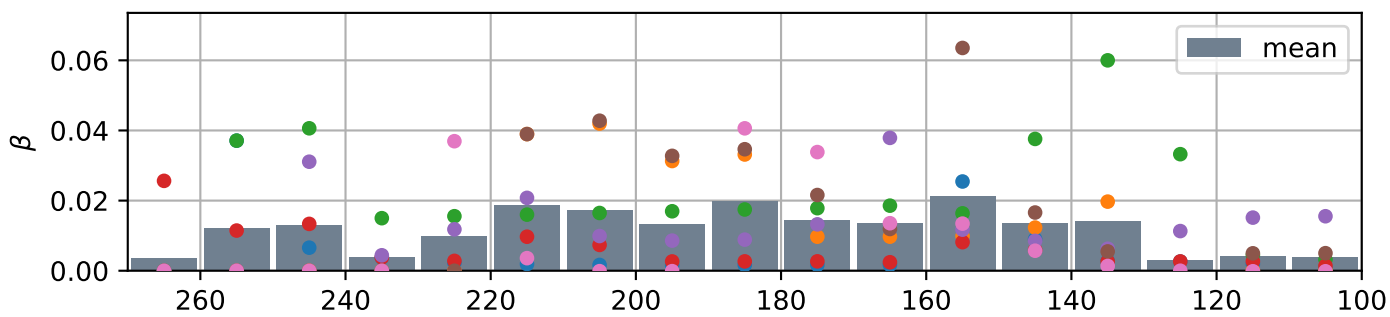

Supplement: Supplementary file 1 [file se-2020-24-supplement.zip]

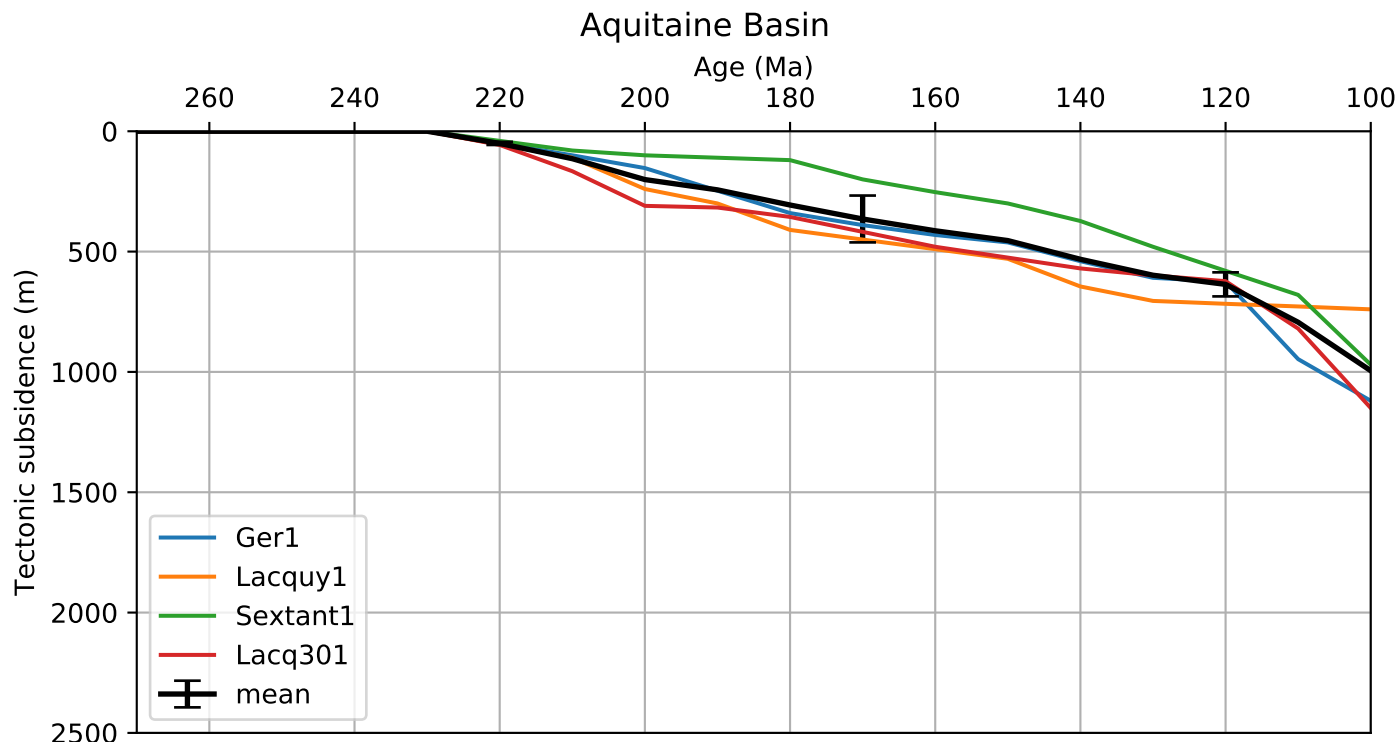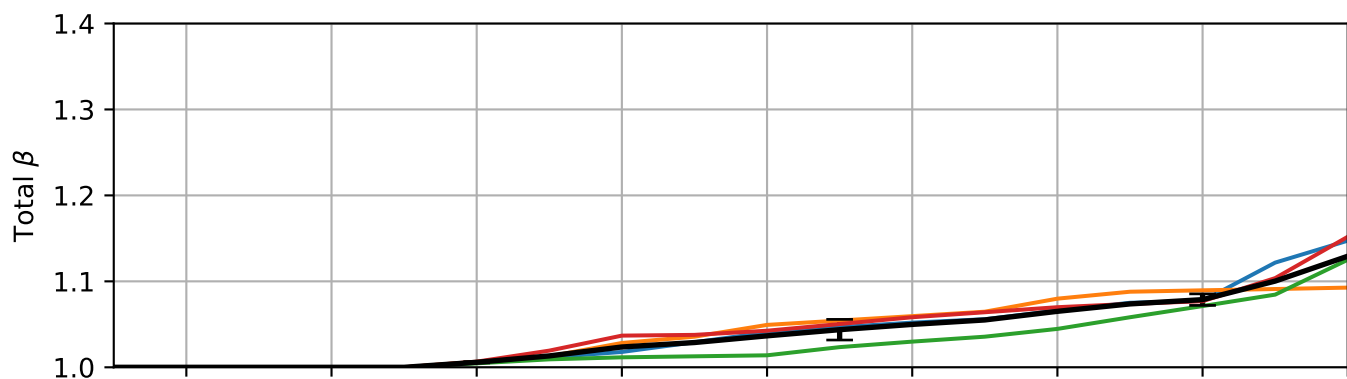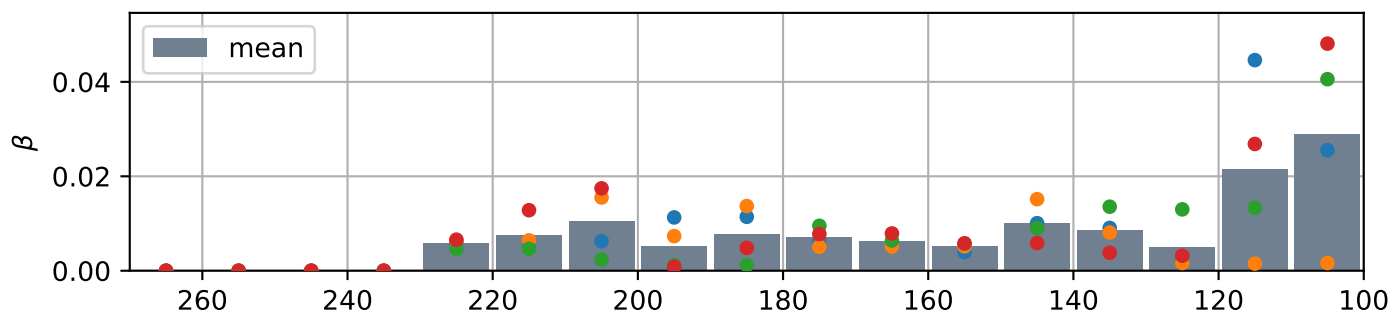

Supplement: Supplementary file 2 [file se-2020-24-supplement.zip]

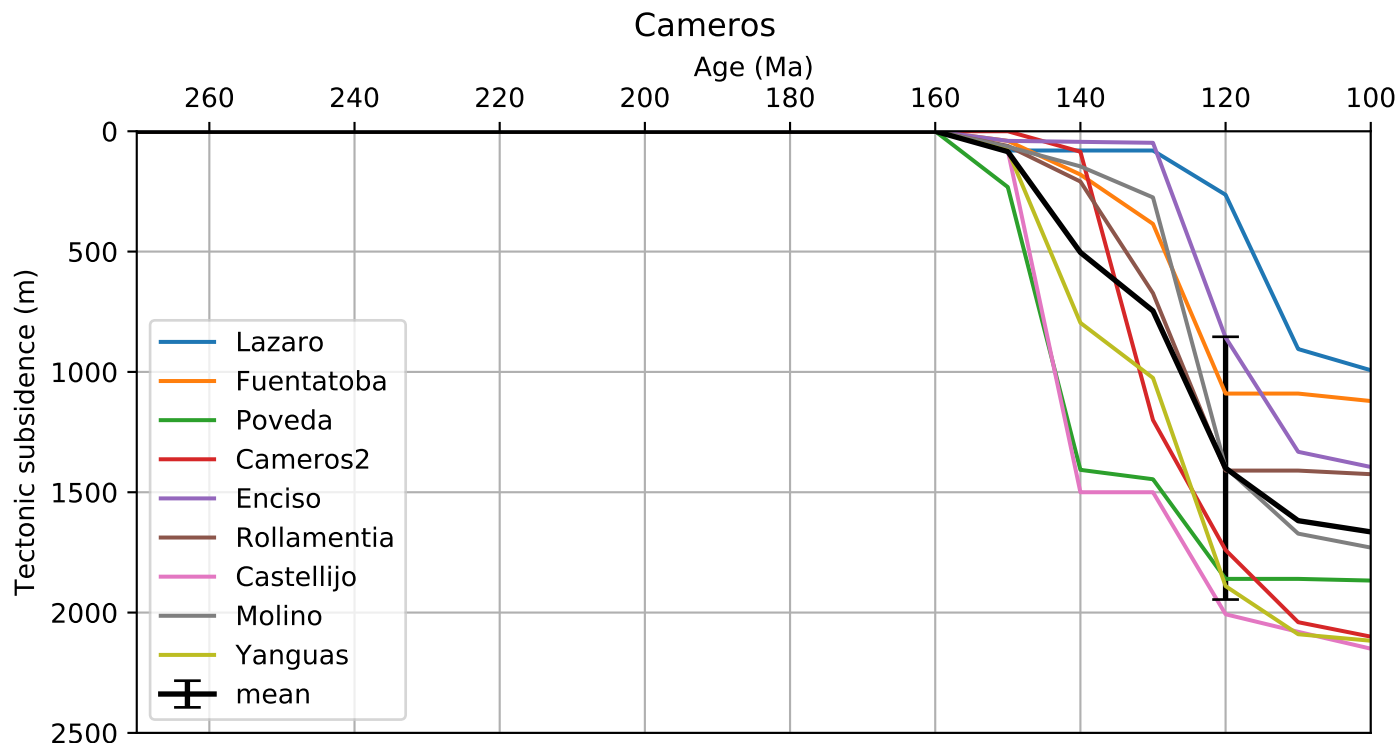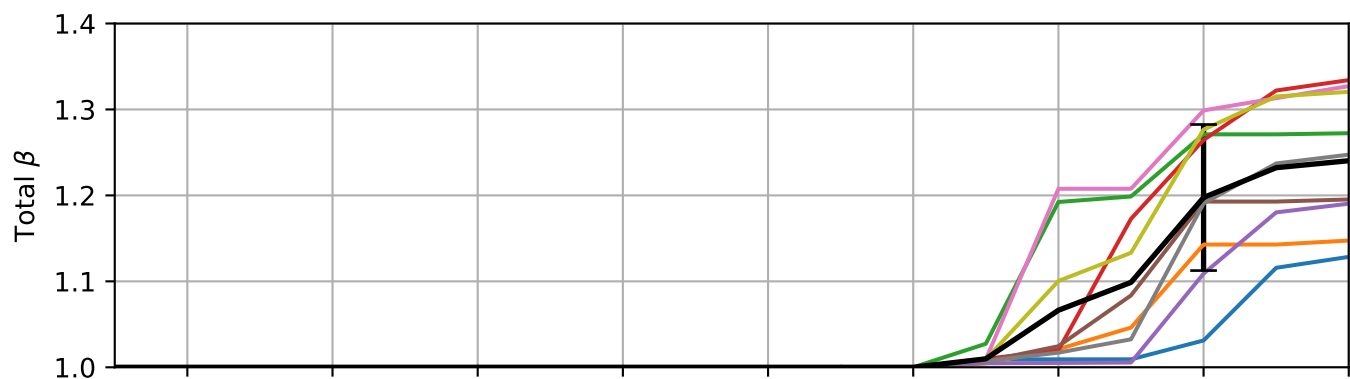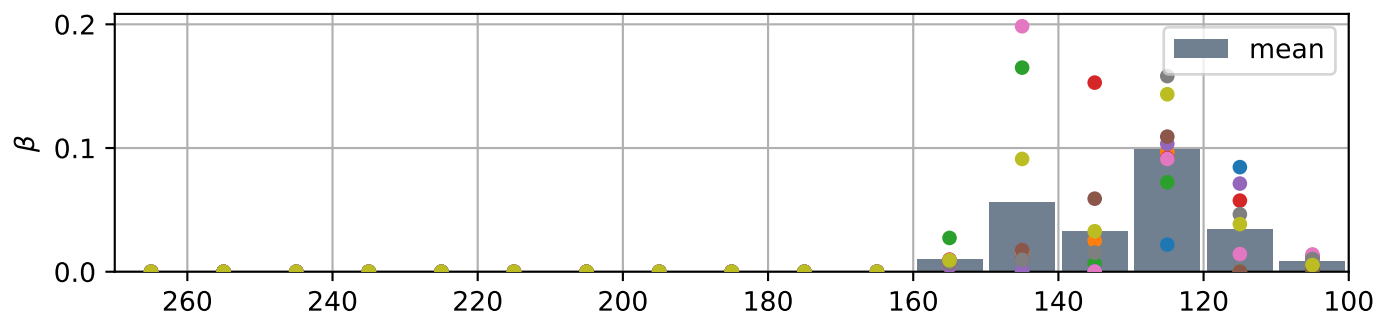

Supplement: Supplementary file 3 [file se-2020-24-supplement.zip]

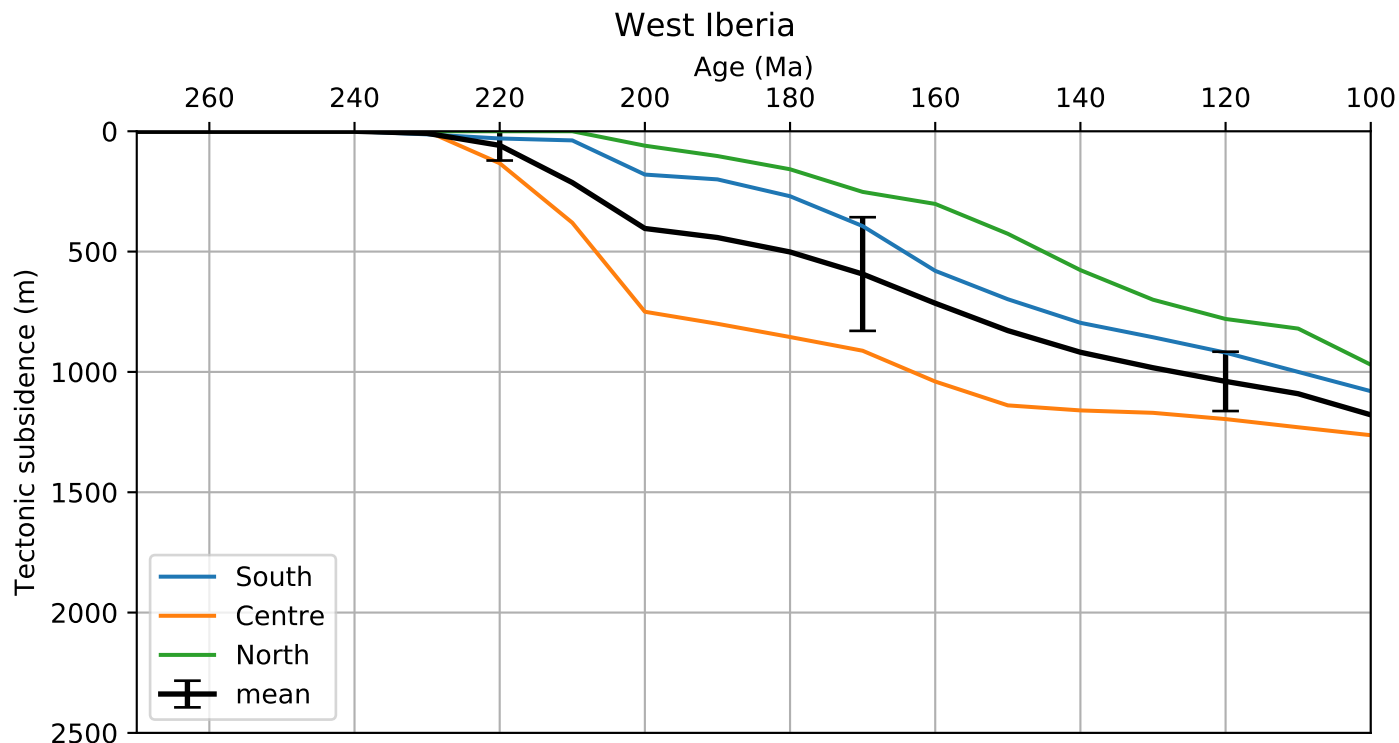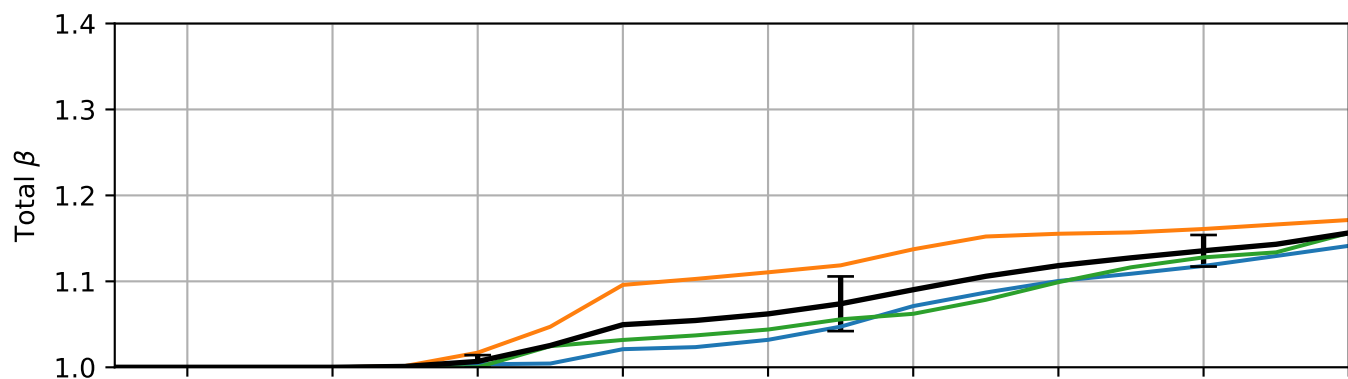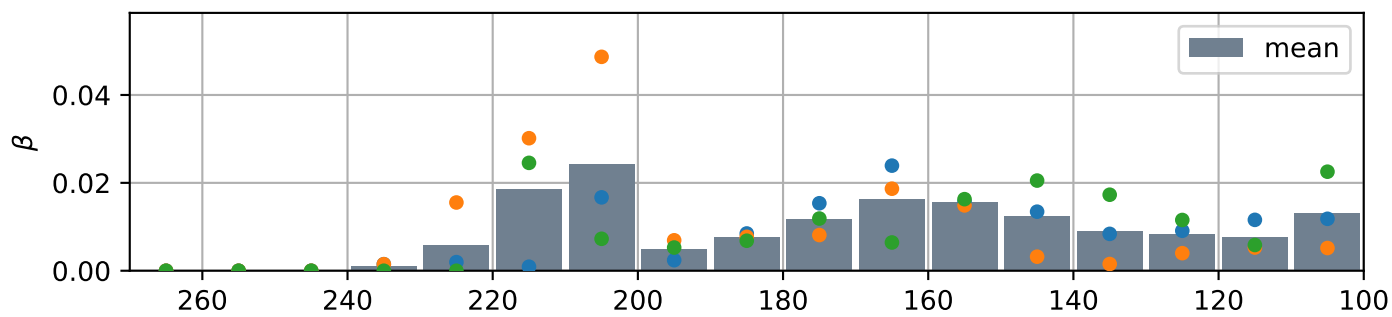

Supplement: Supplementary file 4 [file se-2020-24-supplement.zip]

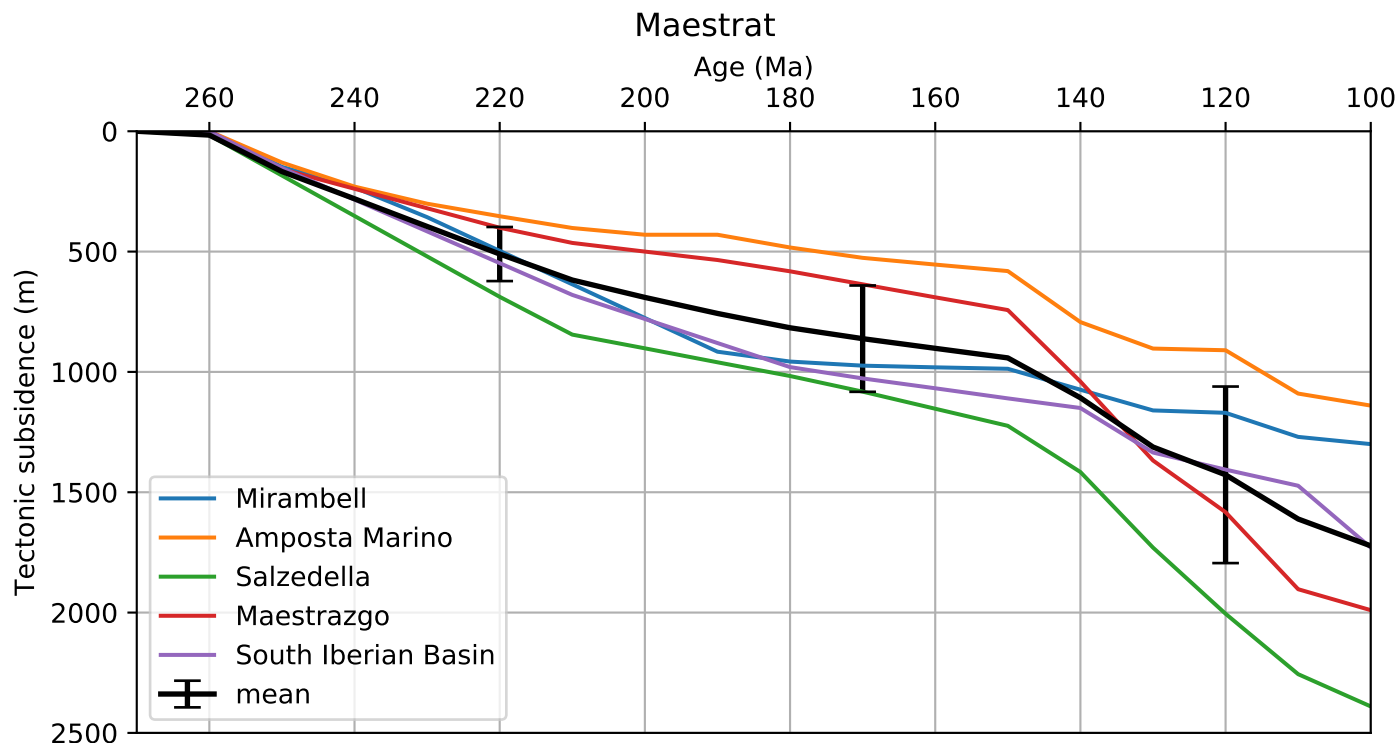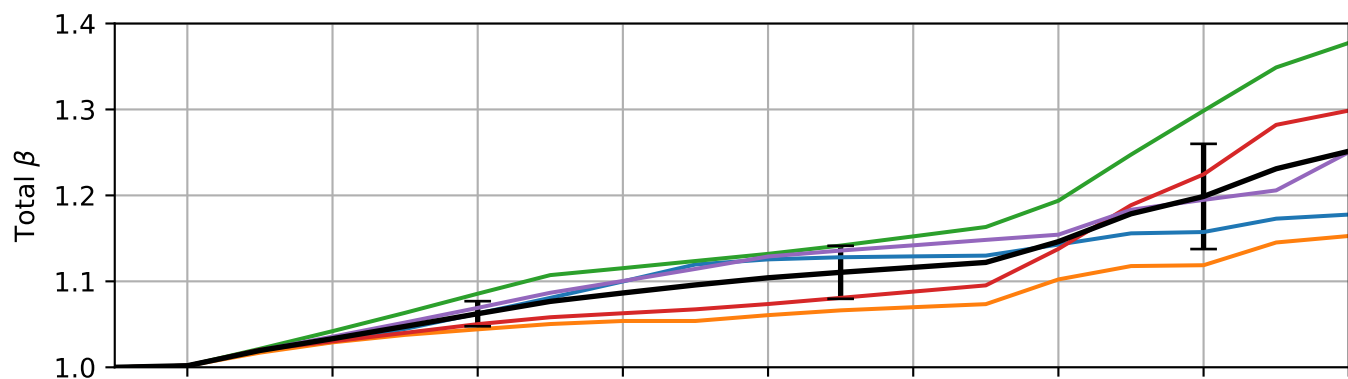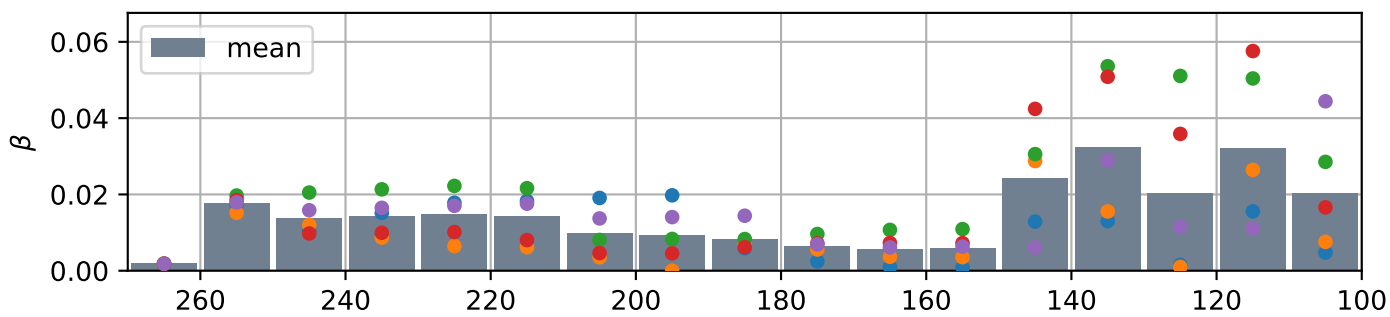

Supplement: Supplementary file 5 [file se-2020-24-supplement.zip]
